1 **TITLE:** Mice infected with *Mycobacterium tuberculosis* are resistant to secondary  
2 infection with SARS-CoV-2

3

4 **RUNNING TITLE:** *M. tuberculosis* and SARS-CoV-2 coinfection in mice

5

6 **AUTHORS:** Oscar Rosas Mejia <sup>1</sup>, Erin S. Gloag <sup>1</sup>, Jianying Li <sup>2</sup>, Marisa Ruane-Foster <sup>1</sup>,  
7 Tiffany A. Claeys <sup>1</sup>, Daniela Farkas <sup>3</sup>, Laszlo Farkas <sup>3</sup>, Gang Xin <sup>1,2</sup>, Richard T. Robinson  
8 <sup>1,\*</sup>

9

10 **AFFILIATIONS:** <sup>1</sup> Department of Microbial Infection and Immunity; <sup>2</sup> Pelotonia Institute  
11 for Immuno-Oncology; <sup>3</sup> Department of Internal Medicine, Division of Pulmonary, Critical  
12 Care and Sleep Medicine, Davis Heart and Lung Research Institute, The Ohio State  
13 University, Columbus, OH, USA.

14

15 \* Corresponding author

16 **ABSTRACT**

17 *Mycobacterium tuberculosis* (Mtb) and SARS-CoV-2 (CoV2) are the leading causes of  
18 death due to infectious disease. Although Mtb and CoV2 both cause serious and  
19 sometimes fatal respiratory infections, the effect of Mtb infection and its associated  
20 immune response on secondary infection with CoV2 is unknown. To address this question  
21 we applied two mouse models of COVID19, using mice which were chronically infected  
22 with Mtb. In both model systems, Mtb-infected mice were resistant to secondary CoV2  
23 infection and its pathological consequences, and CoV2 infection did not affect Mtb  
24 burdens. Single cell RNA sequencing of coinfecting and monoinfected lungs  
25 demonstrated the resistance of Mtb-infected mice is associated with expansion of T and  
26 B cell subsets upon viral challenge. Collectively, these data demonstrate that Mtb  
27 infection conditions the lung environment in a manner that is not conducive to CoV2  
28 survival.

29

30 **AUTHOR SUMMARY**

31 *Mycobacterium tuberculosis* (Mtb) and SARS-CoV-2 (CoV2) are distinct organisms which  
32 both cause lung disease. We report the surprising observation that Mtb-infected mice are  
33 resistant to secondary infection with CoV2, with no impact on Mtb burden and resistance  
34 associating with lung T and B cell expansion.

## 35 INTRODUCTION

36 The world is currently in the midst of two lung disease pandemics: COVID19 and  
37 tuberculosis (TB), the causative agents of which are SARS-CoV-2 (CoV2) and  
38 *Mycobacterium tuberculosis* (Mtb), respectively. Although COVID19 and TB both pose  
39 enormous health challenges, especially in countries where COVID19 vaccines are  
40 scarce, it unknown what if any effect Mtb infection has on host responses to CoV2 as  
41 there are few clinical reports of Mtb/CoV2 coinfection in the absence of other  
42 comorbidities [1, 2]. On the one hand, CoV2 infection may exacerbate the inflammatory  
43 response and pulmonary complications experienced by individuals with TB [3], analogous  
44 to that which is observed in the Mtb/Influenza A or Mtb/CMV coinfecting individuals [4-7].  
45 On the other hand, there is an inverse relationship between TB incidence rates and  
46 COVID19 mortality in numerous countries [8], and *Mycobacterium* spp express several  
47 proteins homologous to CoV2 antigens [9-11], raising the possibility that adaptive immune  
48 responses to Mtb may confer heterologous immunity against CoV2. To definitively  
49 address whether Mtb-infection impacts CoV2 elicited lung disease in a controlled setting,  
50 we applied two mouse models of COVID19 (CoV2 infection of K18-hACE2 mice [12], and  
51 mouse-adapted CoV2 [MACoV2] infection of C57BL/6 mice [13]), using mice that were  
52 chronically infected with Mtb. The results below support a model wherein Mtb infection  
53 confers resistance to secondary infection with CoV2 and its pathological consequences.  
54 The implications of these data for our understanding of COVID19 susceptibility and the  
55 limitations of our study are discussed.

## 56 RESULTS

57 Details regarding the origin, culture, preparation and authentication of CoV2 (strain USA-  
58 WA1/2020), MACoV2 (strain MA10) and Mtb (strain H37Rv) are provided in our *Methods*.  
59 To determine if host responses to CoV2 are affected by Mtb-infection, K18-hACE2  
60 (ACE2) and C57BL/6 (B6) mice were infected with low dose Mtb (~90 CFU) via aerosol  
61 delivery; thirty days later, the ACE2 mice were challenged with CoV2 (~25K PFU) via  
62 intranasal delivery (**FIG 1A**). These Mtb/CoV2 co-infected (Mtb<sup>POS</sup>CoV2<sup>POS</sup>) ACE2 mice  
63 were monitored daily for changes in weight, as were two control groups: ACE2 mice which  
64 were Mtb-infected at the same time (Day -30) but challenged with sterile media  
65 (Mtb<sup>POS</sup>CoV2<sup>NEG</sup>), and ACE2 mice which were not Mtb-infected prior to CoV2 challenge  
66 (Mtb<sup>NEG</sup>CoV2<sup>POS</sup>). On post-challenge Days 4, 7 and 14, groups of mice were euthanized  
67 and the lungs and other tissues were removed to assess Mtb and CoV2 burdens, as well  
68 as a number of immunological readouts. All mice were identically housed for the duration  
69 of the entire experiment. As anticipated, Mtb<sup>NEG</sup>CoV2<sup>POS</sup> ACE2 mice lost a significant  
70 portion of body weight by post-challenge Day 7 ( $\leq 20\%$ ) (**FIG 1B**). Mtb<sup>POS</sup>CoV2<sup>POS</sup> ACE2  
71 mice, however, did not lose significant body weight and were otherwise indistinguishable  
72 from Mtb<sup>POS</sup>CoV2<sup>NEG</sup> controls (**FIG 1B**). On post-challenge Day 4, lung CoV2 burdens  
73 were lower in Mtb<sup>POS</sup>CoV2<sup>POS</sup> mice relative to Mtb<sup>NEG</sup>CoV2<sup>POS</sup> mice, as assessed by  
74 either plaque assay (**FIG 1C**) or CoV2 N protein measurement (**FIG 1D**). Challenge with  
75 CoV2 did not affect Mtb growth, as Mtb CFU burdens in Mtb<sup>POS</sup>CoV2<sup>POS</sup> and  
76 Mtb<sup>POS</sup>CoV2<sup>NEG</sup> lungs did not differ after challenge (**FIG 1E**), nor did they differ in spleen  
77 (**FIG 1F**) or liver (**FIG 1G**). Consistent with the above Mtb CFU results, the abundance of  
78 acid fast bacilli (AFB) was also similar between Mtb<sup>POS</sup>CoV2<sup>POS</sup> and Mtb<sup>POS</sup>CoV2<sup>NEG</sup>

79 lungs (**FIG 1H**). Transgenic human ACE2 expression also does affect Mtb growth, as  
80 CFU burdens in Mtb<sup>POS</sup>CoV2<sup>NEG</sup> ACE2 mice were indistinguishable from Mtb-infected B6  
81 controls (**FIG 1E-G**).

82

83 We next assessed the impact of Mtb infection on CoV2-elicited immune responses in the  
84 lung, using tissue from the same ACE2 transgenic mice described above. CoV2 infection  
85 elicits the expression of multiple inflammatory genes in mouse lungs [12]. Consistent with  
86 this, protein levels of IFN $\gamma$ , IL6 and IL1 $\beta$  were elevated in Mtb<sup>NEG</sup>CoV2<sup>POS</sup> lungs post-  
87 challenge Day 4 and/or Day 7, relative to uninfected (UI) controls (**FIG 2A-C**). In  
88 Mtb<sup>POS</sup>CoV2<sup>NEG</sup> mice, lung protein levels of IFN $\gamma$ , IL6 and IL1 $\beta$  were even higher, and  
89 were not affected by CoV2 challenge (**FIG2A-C**, compare Mtb<sup>POS</sup>CoV2<sup>NEG</sup> and  
90 Mtb<sup>POS</sup>CoV2<sup>POS</sup> levels). This pattern, wherein Mtb mono-infection induces high levels of  
91 a gene expression that are unchanged upon CoV2 challenge, was also observed for IFN $\gamma$   
92 and TNF $\alpha$  at the mRNA level (**FIG 2D-E**); however and notably, the resistance of  
93 Mtb<sup>POS</sup>CoV2<sup>POS</sup> mice did not associate with elevated expression of the antiviral genes  
94 IFIT2 and IFIT3, which are otherwise induced in Mtb<sup>NEG</sup>CoV2<sup>POS</sup> mice (**FIG 2F-G**), nor  
95 was CoV2 able to induce CCL2 expression in the presence of Mtb (**FIG 2H**). Expression  
96 of the anti-inflammatory cytokine IL10 was low in all experimental groups related to UI  
97 controls (**FIG 2I**).

98

99 At a histological level, the lungs of Mtb<sup>NEG</sup>CoV2<sup>POS</sup> mice exhibited a number of previously  
100 reported features [14] by post-challenge Day 4 (**FIG 3A**) and Day 7 (**FIG 3B**), including  
101 diffuse alveolar damage with inflammatory infiltrates and alveolar necrosis. Since these

102 features were also observed in granulomatous lesions of Mtb<sup>POS</sup>CoV2<sup>NEG</sup> lungs, a  
103 hallmark of Mtb infection, we could not use histology to observe whether Mtb inhibits  
104 CoV2-induced inflammation and alveolar necrosis. What could be observed, however,  
105 were differences between Mtb<sup>NEG</sup>CoV2<sup>POS</sup> and Mtb<sup>POS</sup>CoV2<sup>POS</sup> lungs with regards to  
106 hyaline membrane formation and pneumonia in the terminal bronchioles by Day 7 (**FIG**  
107 **3B inset**), which were notable in Mtb<sup>NEG</sup>CoV2<sup>POS</sup> lungs but absent from Mtb<sup>POS</sup>CoV2<sup>POS</sup>  
108 lungs (pneumonia is not typical of Mtb-infected mice on the B6 background until ~1 year  
109 after infection [15]). Consistent with our assessment of lung CoV2 burdens (**FIG 1C-D**),  
110 anti-N protein immunohistochemistry (IHC) staining demonstrated fewer and less intense  
111 IHC+ regions within Mtb<sup>POS</sup>CoV2<sup>POS</sup> lungs, relative to Mtb<sup>NEG</sup>CoV2<sup>POS</sup> lungs (**FIG 3C-D**).  
112 Notably, the few IHC+ regions which were observed in Mtb<sup>POS</sup>CoV2<sup>POS</sup> lungs were distal  
113 to granulomatous lesions that contain Mtb (**FIG 3C**).

114  
115 To determine whether Mtb-induced resistance to CoV2 was specific to the ACE2  
116 transgenic model of COVID19, we performed the same set of experiments using a second  
117 mouse model of COVID19: MACoV2 infection of B6 mice [13]. As before, our  
118 experimental groups included B6 mice which were uninfected prior to MACoV2 challenge  
119 (Mtb<sup>NEG</sup>MACoV2<sup>POS</sup>), or Mtb-infected 30 days prior to challenge with MACoV2  
120 (Mtb<sup>POS</sup>MACoV2<sup>POS</sup>) or vehicle control (Mtb<sup>POS</sup>MACoV2<sup>NEG</sup>) (**FIG 4A**). Whereas ACE2  
121 mice which lost  $\leq 20\%$  body weight within 7 days of CoV2 challenge (**FIG 1B**), MACoV2  
122 induced weight loss was less dramatic, with Mtb<sup>NEG</sup>MACoV2<sup>POS</sup> mice losing  $\leq 10\%$  body  
123 weight within 7 days of MACoV2 challenge (**FIG 4B**). Nevertheless and consistent with  
124 our ACE2 model results, Mtb<sup>POS</sup>MACoV2<sup>POS</sup> were resistant to MACoV2-elicited weight

125 loss (**FIG 4B**), had lower viral burdens compared to Mtb<sup>NEG</sup>MACoV2<sup>POS</sup> mice (**FIG 4C-D**)  
126 and no change in lung Mtb burdens following virus challenge (**FIG 4E**). Following virus  
127 challenge, Mtb<sup>NEG</sup>MACoV2<sup>POS</sup> lungs exhibited transient increases in protein and mRNA  
128 levels of IFN $\gamma$  (**FIG 4F-G**), IL6 (**FIG 4H**), IFIT3 (**FIG4I**), IFITM3 (**FIG4J**) and ACE2 (**FIG**  
129 **4K**), consistent with previous reports of CoV2 inducing expression of its own receptor  
130 [16]. As was also observed in the ACE2 model (**FIG 2A-B**), protein levels of IFN $\gamma$  and IL6  
131 were already high in Mtb<sup>POS</sup>MACoV2<sup>NEG</sup> lungs and unaffected by MACoV2 challenge (**FIG**  
132 **4F, H**). MACoV2 elicited IFIT3 expression in both Mtb<sup>NEG</sup>MACoV2<sup>POS</sup> and  
133 Mtb<sup>POS</sup>MACoV2<sup>POS</sup> lungs, albeit lower in the latter group (**FIG 4J**). The resistance of Mtb-  
134 infected B6 mice to CoV2 was not attributable to an absence of lung ACE2 expression,  
135 as Mtb<sup>POS</sup>MACoV2<sup>POS</sup> mice expressed higher than UI levels of ACE2 (**FIG 4K**); unlike  
136 Mtb<sup>NEG</sup>MACoV2<sup>POS</sup> mice, however, ACE2 expression in Mtb<sup>POS</sup>MACoV2<sup>POS</sup> lungs was  
137 not affected by MACoV2 challenge (**FIG 4K**).

138  
139 Finally, to discern the lung immune environment associated with MACoV2 resistance in  
140 Mtb-infected mice, we used scRNA-seq to analyze live CD45+ cells from the lungs of  
141 each group (UI, Mtb<sup>NEG</sup>MACoV2<sup>POS</sup>, Mtb<sup>POS</sup>MACoV2<sup>NEG</sup> and Mtb<sup>POS</sup>MACoV2<sup>POS</sup>) on  
142 post-challenge Day 7. This timepoint enabled us to analyze immune cells after PFU are  
143 no longer detectable (**FIG 4C**). Live CD45+ cells were purified from the lungs of each  
144 group (4 mice per group) and used to prepare single-cell transcriptome datasets. These  
145 datasets separated into 12 clusters using the dimensionality reduction and clustering  
146 algorithms in the 10X Cell Ranger pipeline (**FIG 5A-C**). The expression profile of 20  
147 myeloid and lymphoid lineage markers (*S100a4*, *S100a9*, *Cd8b1*, *Cd4*, *Cd79a*, *Ms4a1*,



148 *Cybb, Mafb, Cd3g, Fcgr3, Cst3, Nme1, Itgam, Cd8a, Lig1, Ccna2, Ccr7, Il7r, Ncr1* and  
149 *Nkg7*) allowed us to assign biological identities to each cluster (**FIG 5D**). For each lineage  
150 marker, the average expression and percent positivity within each cluster were similar  
151 across all experimental groups (**SFIG1**). We identified four T cell clusters (clusters 0, 2, 4  
152 and 7), two B cell clusters (clusters 3 and 9), three myeloid-cell clusters (clusters 6, 8,  
153 and 10), one basophil cluster (cluster 11), one neutrophil cluster (cluster 5), and one  
154 natural killer–cell cluster (cluster 1) (**FIG 5A**). The extent to which these clusters were  
155 represented among all CD45+ cells varied by group (**FIG 5C, E**). We observed that innate  
156 clusters (i.e. NK, neutrophil, DC, MØ, CD11b+ MØ and basophils) comprised 50% of the  
157 UI lung, with T cells (42 %) and B cells (8%) making up the difference (**FIG 5D**). In  
158 *Mtb*<sup>NEG</sup>MACoV2<sup>POS</sup> lungs, the representation of T cell (51 %) and B cell (16 %) clusters  
159 was higher, as were DC (4 %) and MØ (7 %) clusters. Relative to UI lungs, the  
160 *Mtb*<sup>POS</sup>MACoV2<sup>NEG</sup> lung was characterized by the expansion of nearly all immune  
161 clusters (CD8 T cells, 8→15%; B cells, 6→13%; CD8 memory T cells, 7→9%; DCs,  
162 2→4%; CD4 T cells, 3→6%; CD11b+ MØ, 1→2%; activated B cells, 2→4%; MØ, 1→5%)  
163 at the expense of neutrophils (17→7%), NK cells (28→15%) and naïve T cells (24→21%).  
164 Importantly, the profile of *Mtb*<sup>POS</sup>MACoV2<sup>POS</sup> lungs closely resembled that of  
165 *Mtb*<sup>POS</sup>MACoV2<sup>NEG</sup> lung, with the exception of expanded B cell (17%), CD8 memory T  
166 cell (10%), DC (6%) and activated B cell (5%) clusters, again at the expense of  
167 neutrophils, NK cells and naïve T cells (**FIG 5D**). Collectively, our scRNA seq data  
168 demonstrates the resistance of *Mtb*-infected mice to MACoV2 is associated with a lung  
169 immune environment that is largely similar to that observed in *Mtb* monoinfected lungs,  
170 with the exception of expanded T and B cell clusters.

171 **DISCUSSION**

172 Our results demonstrate that Mtb infected mice are resistant to secondary infection with  
173 CoV2 and its pathological consequences. With regards to the mechanism of resistance,  
174 we believe the inflammatory nature of Mtb infection creates a lung environment that is  
175 inhospitable to CoV2 propagation. In the absence of Mtb, CoV2 enter cells via ACE2,  
176 propagates and triggers an inflammatory response that extends after CoV2 clearance  
177 and causes declines in lung function and death. In the presence of Mtb, CoV2 entry is  
178 likely unaffected since ACE2 is abundantly expressed in the Mtb-infected lung, but the  
179 extent of CoV2 propagation is low and the immunopathological responses typically  
180 triggered in mice (i.e. weight loss, pneumonia) are muted. This is likely due to one or both  
181 of the following reasons: (1) Mtb infected lungs already contain an array of immune innate  
182 lineages which restrict CoV2, or (2) Mtb elicits an adaptive immune response that cross  
183 reacts with CoV2 antigens and offers heterologous immunity. This latter explanation is  
184 supported by recent epidemiological studies of COVID among individuals vaccinated with  
185 *M. bovis* BCG [17-19], which depending on the strain has significant antigenic overlap  
186 with Mtb [20, 21]. The limitations of our study include its being performed in mice, which  
187 of course do not recapitulate all aspects of TB or COVID in humans, nor have we  
188 examined the long term impact of CoV2 on the host response to Mtb as we terminated  
189 our study fourteen days after CoV2 challenge. That said, we believe animal models of  
190 TB and COVID are ideal for studies of this nature because—if studies of COVID in  
191 individuals with other chronic lung diseases are any guide [22, 23]—it will likely be difficult  
192 to tease apart the impact of TB on COVID outcomes in humans given that individuals with  
193 TB often have numerous other comorbidities (e.g. malnourishment, HIV) that confound

194 interpretation. Translated to human COVID susceptibility, our results suggest that  
195 individuals infected with Mtb generate an immune response that offers a degree of  
196 protection from subsequent or secondary infection with CoV2.

197 **MATERIALS & METHODS**

198

199 **SARS-CoV-2 culture, preparation and authentication.** All experiments involving  
200 SARS-CoV-2 followed procedures and protocols that are approved by The Ohio State  
201 University (OSU) Institutional Biosafety Committee. SARS-CoV-2, isolate USA-  
202 WA1/2020, was obtained from Biodefense and Emerging Infections Research Resources  
203 Repository (BEI Resources, Batch # 70034262). Mouse adapted SARS-CoV-2 variant  
204 strain MA10 [24] was likewise provided by BEI Resources (Cat # NR-55329). Virus was  
205 cultured, prepared and authenticated as we recently reported [25]. Namely, to establish  
206 the viral stocks used in our studies, a virus aliquot was thawed, diluted 1:10,000 in  
207 incomplete DMEM (Gibco; supplemented with 4.5 g/L D-glucose, 110 mg/L sodium  
208 pyruvate) and added to confluent VeroE6 cells (ATCC). Cells were incubated with virus  
209 for 1h (37°C, 5% CO<sub>2</sub>), after which time the media was replaced with complete DMEM  
210 (i.e. DMEM prepared as above, further supplemented with 4% heat-inactivated fetal  
211 bovine serum) and the cells were incubated for 3 days (37°C, 5% CO<sub>2</sub>) to allow virus  
212 propagation. After that period, visual inspection under light microscopy demonstrated  
213 near complete death of the infected VeroE6 cells. The supernatant was collected into  
214 50mL conicals, centrifuged at low speed to remove cell debris and subsequently  
215 aliquoted, frozen and stored at -80°C. These frozen aliquots served as the stock tubes  
216 for all subsequent experiments. The live virus titer of our frozen aliquots was determined  
217 via the plaque assay described below. SARS-CoV-2 stocks were authenticated using a  
218 clinically validated clinical next-generation sequencing assay [26].

219 ***Mycobacterium tuberculosis* culture, preparation and authentication.** All  
220 experiments involving *M. tuberculosis* (Mtb) followed procedures and protocols that are  
221 approved by The Ohio State University (OSU) Institutional Biosafety Committee. The  
222 virulent Mtb strain H37Rv (Trudeau Institute, Saranac Lake, NY) was grown in Proskauer  
223 Beck medium containing 0.05% tyloxapol to mid-log phase (37°C, 5% CO<sub>2</sub>) and frozen in  
224 1-ml aliquots at -80°C. The live bacteria titer of our frozen aliquots was determined via  
225 plating serial dilutions on 7H11 agar media. To authenticate our Mtb stock we confirmed  
226 that the colony morphology, *in vitro* growth characteristics and *in vivo* virulence were  
227 consistent with our previous studies using the H37Rv strain [27].

228

229 **Mice.** All mice were treated in accordance with OSU Institutional Animal Care and Use  
230 Committee (IACUC) guidelines and approved protocols. C57BL/6 and hemizygous K18-  
231 hACE C57BL/6J mice (strain: 2B6.Cg-Tg(K18-ACE2)2PrImn/J) were purchased from  
232 Jackson Laboratory (Bar Harbor, ME) and housed at OSU within an AALAC-accredited  
233 facility (University Laboratory Animal Resources, ULAR).

234

235 **Aerosol Mtb infection.** Mice were aerosol infected with Mtb H37Rv per our previous  
236 studies using the Glas-Col inhalation system [27]. For bacterial load determinations, the  
237 lungs, spleen, and liver were aseptically removed and individually homogenized in sterile  
238 normal saline (Gentle Macs system, program “RNA” run 2X). Serial dilutions of each  
239 organ were then plated on 7H11 and colonies counted after 2-3 weeks incubation at 37°C  
240 5% CO<sub>2</sub>. Lungs from control mice were plated on post-infection Day 1 to verify the delivery  
241 of ~80 Mtb CFU.

242

243 **Intranasal CoV2 challenge.** Mice that were either uninfected (UI) or previously infected  
244 with aerosol Mtb (Mtb<sup>POS</sup>) mice were challenged with either CoV2 or MACoV2. At the time  
245 of challenge, mice were anesthetized with isoflurane, weighed and held at a semi-supine  
246 position while 50  $\mu$ L of CoV2-containing PBS ( $2.5 \times 10^4$  PFU) or MACoV2 ( $2.5 \times 10^4$  PFU)  
247 was given via intranasal (i.n.) instillation. Control mice were given the same volume of  
248 sterile PBS, using the same anesthesia and i.n. instillation protocol. After i.n. instillation,  
249 each mouse was returned to its home cage, housed and monitored daily for changes in  
250 weight or body condition. For viral load determinations, the lungs of challenged animals  
251 were aseptically removed and individually homogenized as described above; serial  
252 dilutions were then used in the plaque assay described below.

253

254 **CoV2 plaque assay.** A modified version of the plaque assay developed by the Diamond  
255 laboratory [28] was used to determine lung viral burdens in challenged animals, the  
256 details of which we have reported [29]. Namely, one day prior to the assay start we  
257 seeded 12-well with VeroE6 cells and incubated overnight (37°C 5% CO<sub>2</sub>) such that each  
258 well was confluent by the assay start. On the day of the assay, serial dilutions of virus-  
259 containing material (e.g. lung homogenate) were prepared in cDMEM and warmed to  
260 37°C. Media from each well of the 12-well plate was gently removed via pipette and  
261 replaced with 500 $\mu$ L of each virus sample dilution, the volume pipetted down the side of  
262 the well so as not to disturb the VeroE6 monolayer. The plate was incubated for 1 hr at  
263 37°C 5% CO<sub>2</sub>. During this incubation period, a solution comprising a 1:0.7 mixture of  
264 cDMEM and 2% methylcellulose (viscosity: 4000 cP) was freshly made and warmed to

265 37°C in a water bath. After the 1 hr incubation period was over, the supernatant was  
266 removed from each well and replaced with 1 mL of the pre-warmed  
267 cDMEM:methylcellulose mixture. The culture plate was then returned to the incubator and  
268 left undisturbed for 3 days. On the final day, the cDMEM:methylcellulose mixture was  
269 removed from each well, cells were fixed with 4% para-formaldehyde in PBS (20 minutes,  
270 room temperature), washed with PBS and stained with 0.05% crystal violet (in 20%  
271 methanol). After rinsing plates with distilled water, plates were dried, and plaques were  
272 counted under a light microscope.

273

274 **Histology.** The inferior lung lobe was removed from mice and fixed in 10% formalin.  
275 Sample processing, paraffin embedding, H&E and acid fast bacilli (AFB) staining was  
276 performed by the OSU Comparative Pathology & Mouse Phenotyping Shared Resource  
277 (CPMPSR). Immunohistochemistry (IHC) was performed using a monoclonal antibody  
278 specific to SARS-CoV-2 Nucleocapsid (clone B46F; ThermoFisher) per previously  
279 reported methods [30]. Histology slides were imaged using a Nikon Ti2 widefield  
280 microscope fitted with 4x, 10x and 60x CFI Plan Fluor objectives and a DS-Fi3 color  
281 camera. Images were processed using FIJI [31] and compiled using BioRender.com

282

283 **ELISA.** CoV2 N protein levels in lung homogenates were determined using a  
284 commercially available ELISA kit (ADS Biotec), as were protein levels of the cytokines  
285 IL1 $\beta$ , IL6 and IFN $\gamma$  (Biolegend). ELISA kits were used per manufacturer protocols.

286

287 **Quantitative Real Time PCR.** Lung RNA was extracted from the superior lung lobe using  
288 the RNeasy Mini Kit method (Qiagen) and reverse transcribed using the SuperScript VILO  
289 cDNA Synthesis Kit method (ThermoFisher). Quantitative real time PCR (qRT-PCR) was  
290 performed on a C1000 Touch Thermocycler (Bio-Rad) using SYBR Select Master Mix  
291 (Applied Biosystems) per manufacturer protocols. The primer sequences used to amplify  
292 cDNA for genes of interest were previously published [32, 33]. Each biological replicate  
293 was performed in technical duplicate and data were analyzed using the  $\Delta\Delta C_t$  method.

294

295 **Cell purification.** To purify live CD45+ cells for single cell RNA sequencing, lungs from  
296 uninfected, Mtb- or MACoV2-monoinfected and Mtb/MACoV2 coinfecting mice were  
297 removed and treated in an identical manner. Lungs were first digested in a  
298 DNase/collagenase mixture [34]; dead cells from the resulting slurry were then removed  
299 via negative magnetic selection using the Dead Cell Removal kit method (Miltenyi). The  
300 live cells were then mixed with CD45 microbeads (Miltenyi) and used for positive  
301 magnetic selection of live CD45+ cells. Trypan blue staining was used to confirm cell  
302 viability. Cells were then prepared for single cell partitioning via a 10X Genomics Chromium  
303 Controller using manufacturer provided protocols (10x Genomics Document Number  
304 CG000136).  $1 \times 10^4$  cells per experimental group were loaded onto the Controller and  
305 partitioned, as carried out by the OSU Genomics Shared Resource core.

306

307 **Single cell RNA sequencing (scRNA seq).** scRNA-seq libraries were prepared and  
308 analyzed using the 10X Genomics and Illumina platforms, respectively, per previously  
309 reported methods [35].



310

311 **Statistical analysis.** All experiments were performed using randomly assigned mice  
312 without investigator blinding. All data points and  $p$  values reflect biological replicates from  
313 at least two independent experiments per figure (4 mice per group per timepoint).  
314 Statistical analysis was performed using GraphPad Prism. Unpaired, two-tailed Student  $t$   
315 tests and one-way ANOVA tests with post hoc Tukey-Kramer corrections were used to  
316 assess statistical significance. Graphs were likewise generated in GraphPad Prism. The  
317 only exception to this were the  $t$ -distributed stochastic neighbor embedding (t-SNE),  
318 annotation and graphing associated with our scRNA analysis, which was performed with  
319 Cell Ranger and RStudio.

320 **ACKNOWLEDGEMENTS**

321 The project described was supported by funds from the NIH/NIAID (R01AI121212 to  
322 RTR) and The Ohio State University (OSU). ORM was funded by an OSU Advancing  
323 Research in Infection and Immunity Fellowship Award; ESG was funded by an American  
324 Heart Association Career Development Award (19CDA34630005). We would like to  
325 acknowledge the laboratories of Jianrong Li (OSU), Mark Peeples (OSU & Nationwide  
326 Children's Hospital) and Jacob Yount (OSU) who grew and provided the MACoV2 used  
327 in our studies, as well as BSL3 Director Luanne Hall-Stoodley and BSL3 Research  
328 Assistant Abigail Mayer for maintaining the facilities needed for our studies.

## 329 REFERENCES

330

- 331 1. Riou C, du Bruyn E, Stek C, Daroowala R, Goliath RT, Abrahams F, et al.  
332 Relationship of SARS-CoV-2-specific CD4 response to COVID-19 severity and impact of  
333 HIV-1 and tuberculosis coinfection. *J Clin Invest*. 2021;131(12). Epub 2021/05/05. doi:  
334 10.1172/JCI149125. PubMed PMID: 33945513; PubMed Central PMCID:  
335 PMCPMC8203446.
- 336 2. Tamuzi JL, Ayele BT, Shumba CS, Adetokunboh OO, Uwimana-Nicol J, Haile ZT,  
337 et al. Implications of COVID-19 in high burden countries for HIV/TB: A systematic review  
338 of evidence. *BMC Infect Dis*. 2020;20(1):744. Epub 2020/10/11. doi: 10.1186/s12879-  
339 020-05450-4. PubMed PMID: 33036570; PubMed Central PMCID: PMCPMC7545798.
- 340 3. Mousquer GT, Peres A, Fiegenbaum M. Pathology of TB/COVID-19 Co-Infection:  
341 The phantom menace. *Tuberculosis (Edinb)*. 2021;126:102020. Epub 2020/11/28. doi:  
342 10.1016/j.tube.2020.102020. PubMed PMID: 33246269; PubMed Central PMCID:  
343 PMCPMC7669479.
- 344 4. Mendy J, Jarju S, Heslop R, Bojang AL, Kampmann B, Sutherland JS. Changes in  
345 Mycobacterium tuberculosis-Specific Immunity With Influenza co-infection at Time of TB  
346 Diagnosis. *Front Immunol*. 2018;9:3093. Epub 2019/01/22. doi:  
347 10.3389/fimmu.2018.03093. PubMed PMID: 30662443; PubMed Central PMCID:  
348 PMCPMC6328457.
- 349 5. Cobelens F, Nagelkerke N, Fletcher H. The convergent epidemiology of  
350 tuberculosis and human cytomegalovirus infection. *F1000Res*. 2018;7:280. Epub  
351 2018/05/24. doi: 10.12688/f1000research.14184.2. PubMed PMID: 29780582; PubMed  
352 Central PMCID: PMCPMC5934687.
- 353 6. Walaza S, Tempia S, Dawood H, Variava E, Moyes J, Cohen AL, et al. Influenza  
354 virus infection is associated with increased risk of death amongst patients hospitalized  
355 with confirmed pulmonary tuberculosis in South Africa, 2010-2011. *BMC Infect Dis*.  
356 2015;15:26. Epub 2015/01/28. doi: 10.1186/s12879-015-0746-x. PubMed PMID:  
357 25623944; PubMed Central PMCID: PMCPMC4316613.
- 358 7. Redford PS, Mayer-Barber KD, McNab FW, Stavropoulos E, Wack A, Sher A, et  
359 al. Influenza A virus impairs control of Mycobacterium tuberculosis coinfection through a  
360 type I interferon receptor-dependent pathway. *J Infect Dis*. 2014;209(2):270-4. Epub  
361 2013/08/13. doi: 10.1093/infdis/jit424. PubMed PMID: 23935205; PubMed Central  
362 PMCID: PMCPMC3873785.
- 363 8. Inoue K, Kashima S. Association of the past epidemic of Mycobacterium  
364 tuberculosis with mortality and incidence of COVID-19. *PLoS One*. 2021;16(6):e0253169.  
365 Epub 2021/06/19. doi: 10.1371/journal.pone.0253169. PubMed PMID: 34143810;  
366 PubMed Central PMCID: PMCPMC8213125.
- 367 9. Eggenhuizen PJ, Ng BH, Chang J, Fell AL, Cheong RMY, Wong WY, et al. BCG  
368 Vaccine Derived Peptides Induce SARS-CoV-2 T Cell Cross-Reactivity. *Front Immunol*.  
369 2021;12:692729. Epub 2021/08/24. doi: 10.3389/fimmu.2021.692729. PubMed PMID:  
370 34421902; PubMed Central PMCID: PMCPMC8374943.
- 371 10. Dakal TC. Antigenic sites in SARS-CoV-2 spike RBD show molecular similarity  
372 with pathogenic antigenic determinants and harbors peptides for vaccine development.  
373 *Immunobiology*. 2021;226(5):152091. Epub 2021/07/26. doi:

- 374 10.1016/j.imbio.2021.152091. PubMed PMID: 34303920; PubMed Central PMCID:  
375 PMCPMC8297981.
- 376 11. Nuovo G, Tili E, Suster D, Matys E, Hupp L, Magro C. Strong homology between  
377 SARS-CoV-2 envelope protein and a Mycobacterium sp. antigen allows rapid diagnosis  
378 of Mycobacterial infections and may provide specific anti-SARS-CoV-2 immunity via the  
379 BCG vaccine. *Ann Diagn Pathol.* 2020;48:151600. Epub 2020/08/18. doi:  
380 10.1016/j.anndiagpath.2020.151600. PubMed PMID: 32805515; PubMed Central  
381 PMCID: PMCPMC7423587.
- 382 12. Winkler ES, Bailey AL, Kafai NM, Nair S, McCune BT, Yu J, et al. SARS-CoV-2  
383 infection of human ACE2-transgenic mice causes severe lung inflammation and impaired  
384 function. *Nat Immunol.* 2020;21(11):1327-35. Epub 2020/08/26. doi: 10.1038/s41590-  
385 020-0778-2. PubMed PMID: 32839612; PubMed Central PMCID: PMCPMC7578095.
- 386 13. Dinnon KH, 3rd, Leist SR, Schafer A, Edwards CE, Martinez DR, Montgomery SA,  
387 et al. A mouse-adapted model of SARS-CoV-2 to test COVID-19 countermeasures.  
388 *Nature.* 2020;586(7830):560-6. Epub 2020/08/28. doi: 10.1038/s41586-020-2708-8.  
389 PubMed PMID: 32854108; PubMed Central PMCID: PMCPMC8034761.
- 390 14. Jiang RD, Liu MQ, Chen Y, Shan C, Zhou YW, Shen XR, et al. Pathogenesis of  
391 SARS-CoV-2 in Transgenic Mice Expressing Human Angiotensin-Converting Enzyme 2.  
392 *Cell.* 2020;182(1):50-8 e8. Epub 2020/06/10. doi: 10.1016/j.cell.2020.05.027. PubMed  
393 PMID: 32516571; PubMed Central PMCID: PMCPMC7241398.
- 394 15. Rhoades ER, Frank AA, Orme IM. Progression of chronic pulmonary tuberculosis  
395 in mice aerogenically infected with virulent Mycobacterium tuberculosis. *Tuber Lung Dis.*  
396 1997;78(1):57-66. Epub 1997/01/01. doi: 10.1016/s0962-8479(97)90016-2. PubMed  
397 PMID: 9666963.
- 398 16. Ziegler CGK, Allon SJ, Nyquist SK, Mbanjo IM, Miao VN, Tzouanas CN, et al.  
399 SARS-CoV-2 Receptor ACE2 Is an Interferon-Stimulated Gene in Human Airway  
400 Epithelial Cells and Is Detected in Specific Cell Subsets across Tissues. *Cell.*  
401 2020;181(5):1016-35 e19. Epub 2020/05/16. doi: 10.1016/j.cell.2020.04.035. PubMed  
402 PMID: 32413319; PubMed Central PMCID: PMCPMC7252096.
- 403 17. Escobar LE, Molina-Cruz A, Barillas-Mury C. BCG vaccine protection from severe  
404 coronavirus disease 2019 (COVID-19). *Proc Natl Acad Sci U S A.* 2020;117(30):17720-  
405 6. Epub 2020/07/11. doi: 10.1073/pnas.2008410117. PubMed PMID: 32647056; PubMed  
406 Central PMCID: PMCPMC7395502.
- 407 18. Hauer J, Fischer U, Auer F, Borkhardt A. Regional BCG vaccination policy in  
408 former East- and West Germany may impact on both severity of SARS-CoV-2 and  
409 incidence of childhood leukemia. *Leukemia.* 2020;34(8):2217-9. Epub 2020/06/20. doi:  
410 10.1038/s41375-020-0871-4. PubMed PMID: 32555367; PubMed Central PMCID:  
411 PMCPMC7301049.
- 412 19. O'Neill LAJ, Netea MG. BCG-induced trained immunity: can it offer protection  
413 against COVID-19? *Nat Rev Immunol.* 2020;20(6):335-7. Epub 2020/05/13. doi:  
414 10.1038/s41577-020-0337-y. PubMed PMID: 32393823; PubMed Central PMCID:  
415 PMCPMC7212510.
- 416 20. Coppola M, Jurion F, van den Eeden SJF, Tima HG, Franken K, Geluk A, et al. In-  
417 vivo expressed Mycobacterium tuberculosis antigens recognised in three mouse strains  
418 after infection and BCG vaccination. *NPJ Vaccines.* 2021;6(1):81. Epub 2021/06/05. doi:

- 419 10.1038/s41541-021-00343-2. PubMed PMID: 34083546; PubMed Central PMCID:  
420 PMCPMC8175414.
- 421 21. Zhang W, Zhang Y, Zheng H, Pan Y, Liu H, Du P, et al. Genome sequencing and  
422 analysis of BCG vaccine strains. *PLoS One*. 2013;8(8):e71243. Epub 2013/08/27. doi:  
423 10.1371/journal.pone.0071243. PubMed PMID: 23977002; PubMed Central PMCID:  
424 PMCPMC3747166.
- 425 22. Lacedonia D, Scioscia G, Santomasi C, Fuso P, Carpagnano GE, Portacci A, et  
426 al. Impact of smoking, COPD and comorbidities on the mortality of COVID-19 patients.  
427 *Sci Rep*. 2021;11(1):19251. Epub 2021/09/30. doi: 10.1038/s41598-021-98749-4.  
428 PubMed PMID: 34584165; PubMed Central PMCID: PMCPMC8478875.
- 429 23. Hadi YB, Lakhani DA, Naqvi SFZ, Singh S, Kupec JT. Outcomes of SARS-CoV-2  
430 infection in patients with pulmonary sarcoidosis: A multicenter retrospective research  
431 network study. *Respir Med*. 2021;187:106538. Epub 2021/07/30. doi:  
432 10.1016/j.rmed.2021.106538. PubMed PMID: 34325226; PubMed Central PMCID:  
433 PMCPMC8297986.
- 434 24. Leist SR, Dinnon KH, 3rd, Schafer A, Tse LV, Okuda K, Hou YJ, et al. A Mouse-  
435 Adapted SARS-CoV-2 Induces Acute Lung Injury and Mortality in Standard Laboratory  
436 Mice. *Cell*. 2020;183(4):1070-85 e12. Epub 2020/10/09. doi: 10.1016/j.cell.2020.09.050.  
437 PubMed PMID: 33031744; PubMed Central PMCID: PMCPMC7510428.
- 438 25. Bednash JS, Kagan VE, Englert JA, Farkas D, Tyurina YY, Tyurin VA, et al. Syrian  
439 hamsters as a model of lung injury with SARS-CoV-2 infection: pathologic, physiologic  
440 and detailed molecular profiling. *Transl Res*. 2021. Epub 2021/11/07. doi:  
441 10.1016/j.trsl.2021.10.007. PubMed PMID: 34740873.
- 442 26. Wang H, Jean S, Eltringham R, Madison J, Snyder P, Tu H, et al. Mutation-Specific  
443 SARS-CoV-2 PCR Screen: Rapid and Accurate Detection of Variants of Concern and the  
444 Identification of a Newly Emerging Variant with Spike L452R Mutation. *J Clin Microbiol*.  
445 2021;59(8):e0092621. Epub 2021/05/21. doi: 10.1128/JCM.00926-21. PubMed PMID:  
446 34011523; PubMed Central PMCID: PMCPMC8288299.
- 447 27. Miller HE, Robinson RT. Early control of *Mycobacterium tuberculosis* infection  
448 requires *il12rb1* expression by *rag1*-dependent lineages. *Infect Immun*.  
449 2012;80(11):3828-41. Epub 2012/08/22. doi: 10.1128/IAI.00426-12. PubMed PMID:  
450 22907814; PubMed Central PMCID: PMCPMC3486065.
- 451 28. Case JB, Bailey AL, Kim AS, Chen RE, Diamond MS. Growth, detection,  
452 quantification, and inactivation of SARS-CoV-2. *Virology*. 2020;548:39-48. Epub  
453 2020/08/26. doi: 10.1016/j.virol.2020.05.015. PubMed PMID: 32838945; PubMed Central  
454 PMCID: PMCPMC7293183.
- 455 29. Robinson RT, Mahfooz N, Rosas Mejia O, Liu Y, Hull NM. SARS-CoV-2  
456 disinfection in aqueous solution by UV222 from a krypton chlorine excilamp. *medRxiv*.  
457 2021;<https://doi.org/10.1101/2021.02.19.21252101> (Preprint posted February 23, 2021).
- 458 30. Farkas L, Farkas D, Ask K, Moller A, Gauldie J, Margetts P, et al. VEGF  
459 ameliorates pulmonary hypertension through inhibition of endothelial apoptosis in  
460 experimental lung fibrosis in rats. *J Clin Invest*. 2009;119(5):1298-311. Epub 2009/04/22.  
461 doi: 10.1172/JCI36136. PubMed PMID: 19381013; PubMed Central PMCID:  
462 PMCPMC2673845.
- 463 31. Schindelin J, Arganda-Carreras I, Frise E, Kaynig V, Longair M, Pietzsch T, et al.  
464 Fiji: an open-source platform for biological-image analysis. *Nat Methods*. 2012;9(7):676-

- 465 82. Epub 2012/06/30. doi: 10.1038/nmeth.2019. PubMed PMID: 22743772; PubMed  
466 Central PMCID: PMCPMC3855844.
- 467 32. Ma D, Chen CB, Jhanji V, Xu C, Yuan XL, Liang JJ, et al. Expression of SARS-  
468 CoV-2 receptor ACE2 and TMPRSS2 in human primary conjunctival and pterygium cell  
469 lines and in mouse cornea. *Eye (Lond)*. 2020;34(7):1212-9. Epub 2020/05/10. doi:  
470 10.1038/s41433-020-0939-4. PubMed PMID: 32382146; PubMed Central PMCID:  
471 PMCPMC7205026.
- 472 33. Lafuse WP, Rajaram MVS, Wu Q, Moliva JI, Torrelles JB, Turner J, et al.  
473 Identification of an Increased Alveolar Macrophage Subpopulation in Old Mice That  
474 Displays Unique Inflammatory Characteristics and Is Permissive to Mycobacterium  
475 tuberculosis Infection. *J Immunol*. 2019;203(8):2252-64. Epub 2019/09/13. doi:  
476 10.4049/jimmunol.1900495. PubMed PMID: 31511357; PubMed Central PMCID:  
477 PMCPMC6783358.
- 478 34. Jungblut M, Oeltze K, Zehnter I, Hasselmann D, Bosio A. Standardized preparation  
479 of single-cell suspensions from mouse lung tissue using the gentleMACS Dissociator. *J*  
480 *Vis Exp*. 2009;(29). Epub 2009/07/04. doi: 10.3791/1266. PubMed PMID: 19574953;  
481 PubMed Central PMCID: PMCPMC2798855.
- 482 35. Xin G, Chen Y, Topchyan P, Kasmani MY, Burns R, Volberding PJ, et al. Targeting  
483 PIM1-Mediated Metabolism in Myeloid Suppressor Cells to Treat Cancer. *Cancer*  
484 *Immunol Res*. 2021;9(4):454-69. Epub 2021/02/14. doi: 10.1158/2326-6066.CIR-20-  
485 0433. PubMed PMID: 33579728; PubMed Central PMCID: PMCPMC8137571.
- 486

487

488 **FIGURE LEGENDS**

489

490 **FIGURE 1. Mtb-infected ACE2 mice are resistant to secondary infection with CoV2.**

491 **(A)** Experimental overview of our ACE2:CoV2 model studies, wherein mice were infected  
492 via aerosol with Mtb (Day -30) and challenged 30 days later (Day 0) with CoV2. On post-  
493 challenge Day 4, Day 7 and Day 14, tissues were collected for microbiological and  
494 immunological assessments. Experimental groups included ACE2 mice which were not  
495 infected with Mtb prior to CoV2 challenge (Mtb<sup>NEG</sup>CoV2<sup>POS</sup>), ACE2 mice which were  
496 infected with Mtb but challenged with sterile saline (Mtb<sup>POS</sup>CoV2<sup>NEG</sup>), ACE2 mice which  
497 were infected with Mtb prior to CoV2 challenge (Mtb<sup>POS</sup>CoV2<sup>POS</sup>), and B6 controls which  
498 were infected with Mtb (to determine what if any impact human ACE2 transgene  
499 expression alone has on Mtb burdens). **(B)** The percent weight change experienced by  
500 each group of ACE2 mice following CoV2 challenge, as normalized to the original weight  
501 of each mouse. **(C)** CoV2 PFU burdens and **(D)** CoV2 N protein levels in the lungs of  
502 Mtb<sup>NEG</sup>CoV2<sup>POS</sup> and Mtb<sup>NEG</sup>CoV2<sup>POS</sup> mice. **(E-G)** Mtb CFU burdens in the **(E)** lungs, **(F)**  
503 spleen and **(G)** liver of Mtb<sup>POS</sup>CoV2<sup>NEG</sup> and Mtb<sup>POS</sup>CoV2<sup>POS</sup> mice, as well as B6 controls  
504 throughout the experiment time course. In each graph the following legend applies:  
505 Mtb<sup>NEG</sup>CoV2<sup>POS</sup>, black circles or bars; Mtb<sup>POS</sup>CoV2<sup>NEG</sup>, gray circles; Mtb<sup>POS</sup>CoV2<sup>POS</sup>,  
506 white circles or bars. **(H)** Representative micrographs of AFB stained lung sections, as  
507 collected from Mtb<sup>POS</sup>CoV2<sup>NEG</sup> and Mtb<sup>POS</sup>CoV2<sup>POS</sup> mice at the indicated times post-  
508 challenge. In each micrograph, the large scale bar is 20  $\mu$ M and inset scale bar is 5  $\mu$ M.  
509 This experiment was repeated twice, each with similar results (4 mice/group/timepoint).  
510 \*,  $p \leq 0.05$  as determined by either Student's t-test or ANOVA; n.s., not significant.

511

512 **FIGURE 2. CoV2-elicited cytokine responses are muted in the presence of Mtb**  
513 **infection.** On the indicated days, lung tissue from Mtb<sup>NEG</sup>CoV2<sup>POS</sup>, Mtb<sup>POS</sup>CoV2<sup>NEG</sup>,  
514 Mtb<sup>POS</sup>CoV2<sup>POS</sup> and uninfected (UI) ACE2 mice was used to measure **(A-C)** protein levels  
515 of **(A)** IFN $\gamma$ , **(B)** IL6 and **(C)** IL1 $\beta$ , as well as **(D-I)** mRNA levels of **(D)** IFN $\gamma$ , **(E)** TNF $\alpha$ , **(F)**  
516 IFIT2, **(G)** IFIT3, **(H)** CCL2 and **(I)** IL10. This experiment was repeated twice, each with  
517 similar results (4 mice/group/timepoint). \*, p  $\leq$  0.05 as determined by either Student's t-  
518 test or ANOVA; §, significant relative to UI protein levels.

519

520 **FIGURE 3. CoV2 infection of the airways and associated pneumonia are attenuated**  
521 **in the presence of Mtb.** Representative micrographs of **(A-B)** H&E and **(C-D)** CoV2 N  
522 protein IHC stained lung sections from each experimental group, as collected on **(A, C)**  
523 Day 4 or **(B, D)** Day 7 post challenge. In each micrograph the large scale bar represents  
524 200 microns; insets are 50 microns.

525

526 **FIGURE 4. Mtb-infected B6 mice are resistant to secondary infection with MACoV2.**  
527 **(A)** Experimental overview of our B6:MACoV2 model studies, wherein mice were infected  
528 via aerosol with Mtb (Day -30) and challenged 30 days later (Day 0) with MACoV2. On  
529 post-challenge Days 4, 7 and 14 we collected lung tissue for microbiological and  
530 immunological assessments. Experimental groups included B6 mice which were not  
531 infected with Mtb prior to MACoV2 challenge (Mtb<sup>NEG</sup>MACoV2<sup>POS</sup>), B6 mice which were  
532 infected with Mtb but challenged with sterile saline (Mtb<sup>POS</sup>MACoV2<sup>NEG</sup>), and B6 mice  
533 which were infected with Mtb prior to CoV2 challenge (Mtb<sup>POS</sup>MACoV2<sup>POS</sup>). **(B)** The



534 percent weight change experienced by each group of B6 mice following MACoV2  
535 challenge, as normalized to the original weight of each mouse. **(C-D)** Lung viral burdens  
536 in  $Mtb^{NEG}MACoV2^{POS}$  and  $Mtb^{POS}MACoV2^{POS}$  mice, as measured by **(C)** MACoV2 PFU  
537 or **(D)** MACoV2 N protein concentration on the indicated days, as well as **(E)** lung Mtb  
538 CFU burdens at the same timepoints. **(F, H)** Lung protein levels of **(F)**  $IFN\gamma$  and **(H)** IL6,  
539 as well as **(G, I-K)** mRNA levels of **(G)**  $IFN\gamma$ , **(I)** IFIT3, **(J)** IFITM3 and **(K)** ACE2. This  
540 experiment was repeated twice, each with similar results (4 mice/group/timepoint). \*,  $p \leq$   
541 0.05 as determined by either Student's t-test or ANOVA; §, significant relative to UI protein  
542 levels.

543

544 **FIGURE 5. Lung T and B cell subsets expand upon challenge of  $Mtb^{POS}$  mice with**  
545 **MACoV2.** As an unbiased means to define and compare the lung immune landscape,  
546 live CD45+ cells were purified from the lungs of four experimental groups (Uninfected, UI;  
547  $Mtb^{NEG}MACoV2^{POS}$ ;  $Mtb^{POS}MACoV2^{NEG}$ ;  $Mtb^{POS}MACoV2^{POS}$ ) on post-challenge Day 7  
548 and used for scRNA analysis. **(A-C)** t-SNE plots of the resulting data, either **(A-B)** pooled  
549 across groups or **(C)** segregated by group to show **(A)** the extent of overlay and **(B-C)**  
550 clustering of data into 12 immune lineages. **(D)** The distribution and expression patterns  
551 of lineage defining genes which we used to annotate each cluster, as pooled from all  
552 group data (individual group data are shown in **Supplemental Figure 1**). **(E)** The  
553 proportion of each immune lineage in the lungs of each experimental group. MØ,  
554 macrophage; DC, dendritic cell; NK, natural killer.

555

556 **SUPPLEMENTAL FIGURE 1. Lineage defining markers were similarly expressed**  
557 **across uninfected (UI),  $Mtb^{NEG}MACoV2^{POS}$ ,  $Mtb^{POS}MACoV2^{NEG}$  and**  
558  **$Mtb^{POS}MACoV2^{POS}$  groups.** The distribution and expression patterns of lineage defining  
559 genes that were used to annotate each t-SNE cluster, as shown for each individual  
560 experimental group (pooled group data are shown in **Figure 5**).

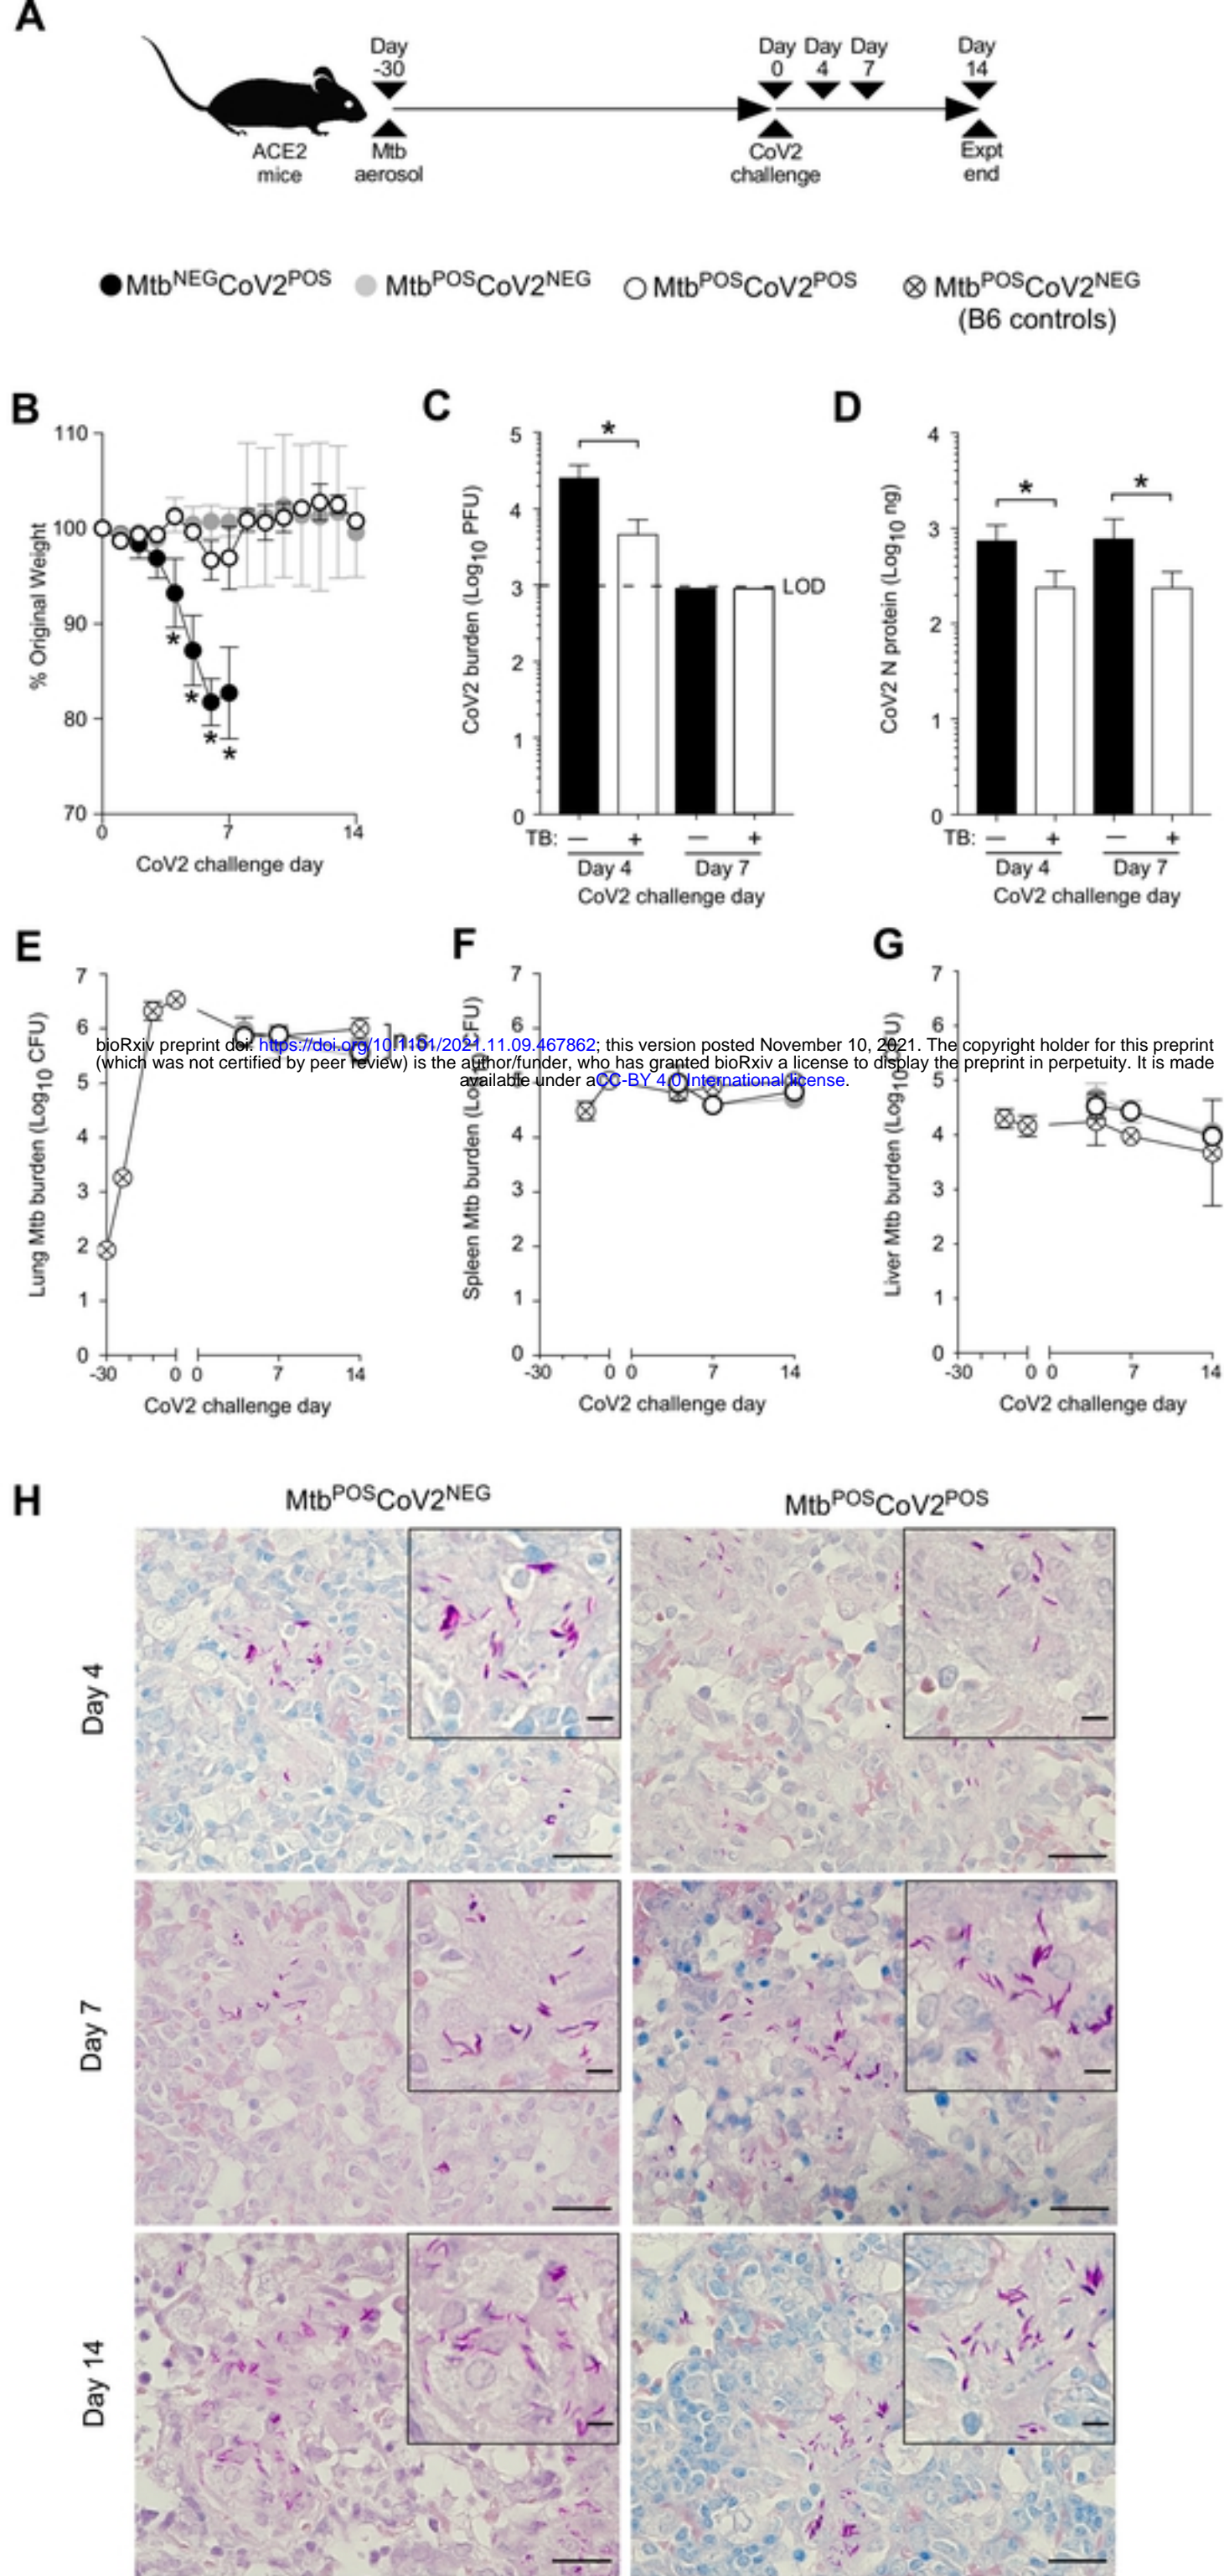

**FIG 1**

Figure 1

bioRxiv preprint doi: <https://doi.org/10.1101/2021.11.09.467862>; this version posted November 10, 2021. The copyright holder for this preprint (which was not certified by peer review) is the author/funder, who has granted bioRxiv a license to display the preprint in perpetuity. It is made available under aCC-BY 4.0 International license.

○ Uninfected (UI) ● Mtb<sup>NEG</sup>CoV2<sup>POS</sup> ● Mtb<sup>POS</sup>CoV2<sup>NEG</sup> ○ Mtb<sup>POS</sup>CoV2<sup>POS</sup>

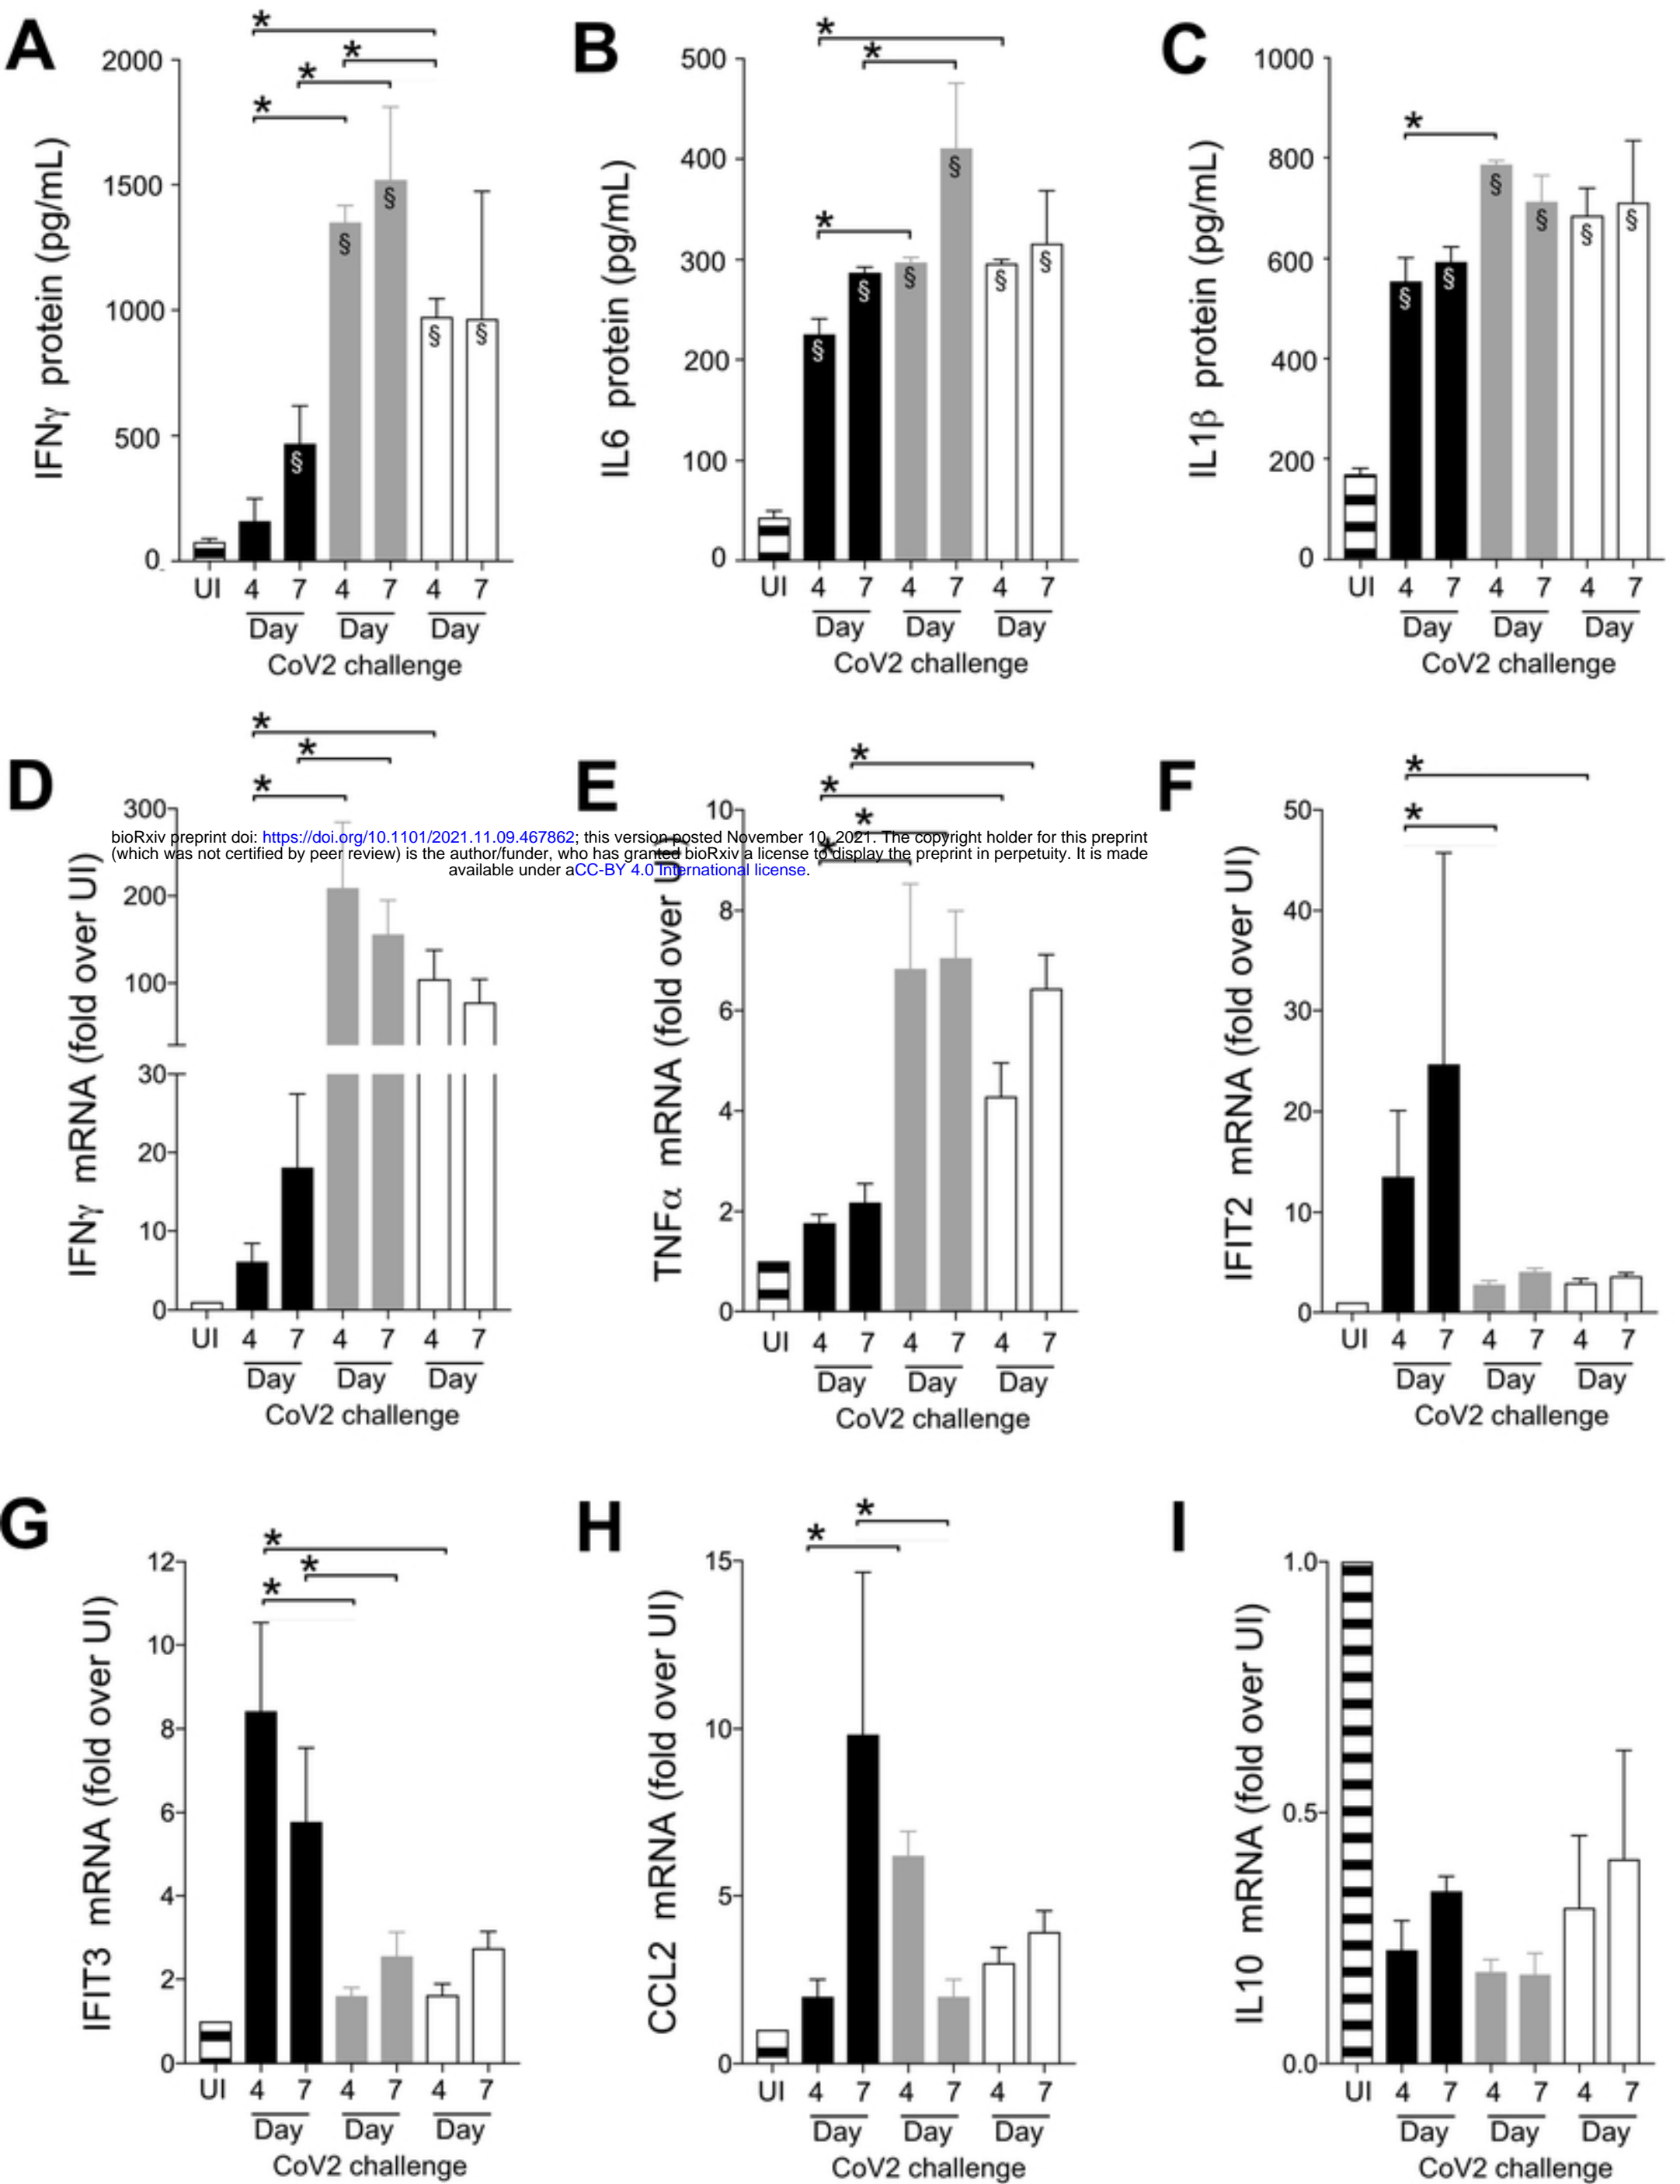

FIG 2

Figure 2

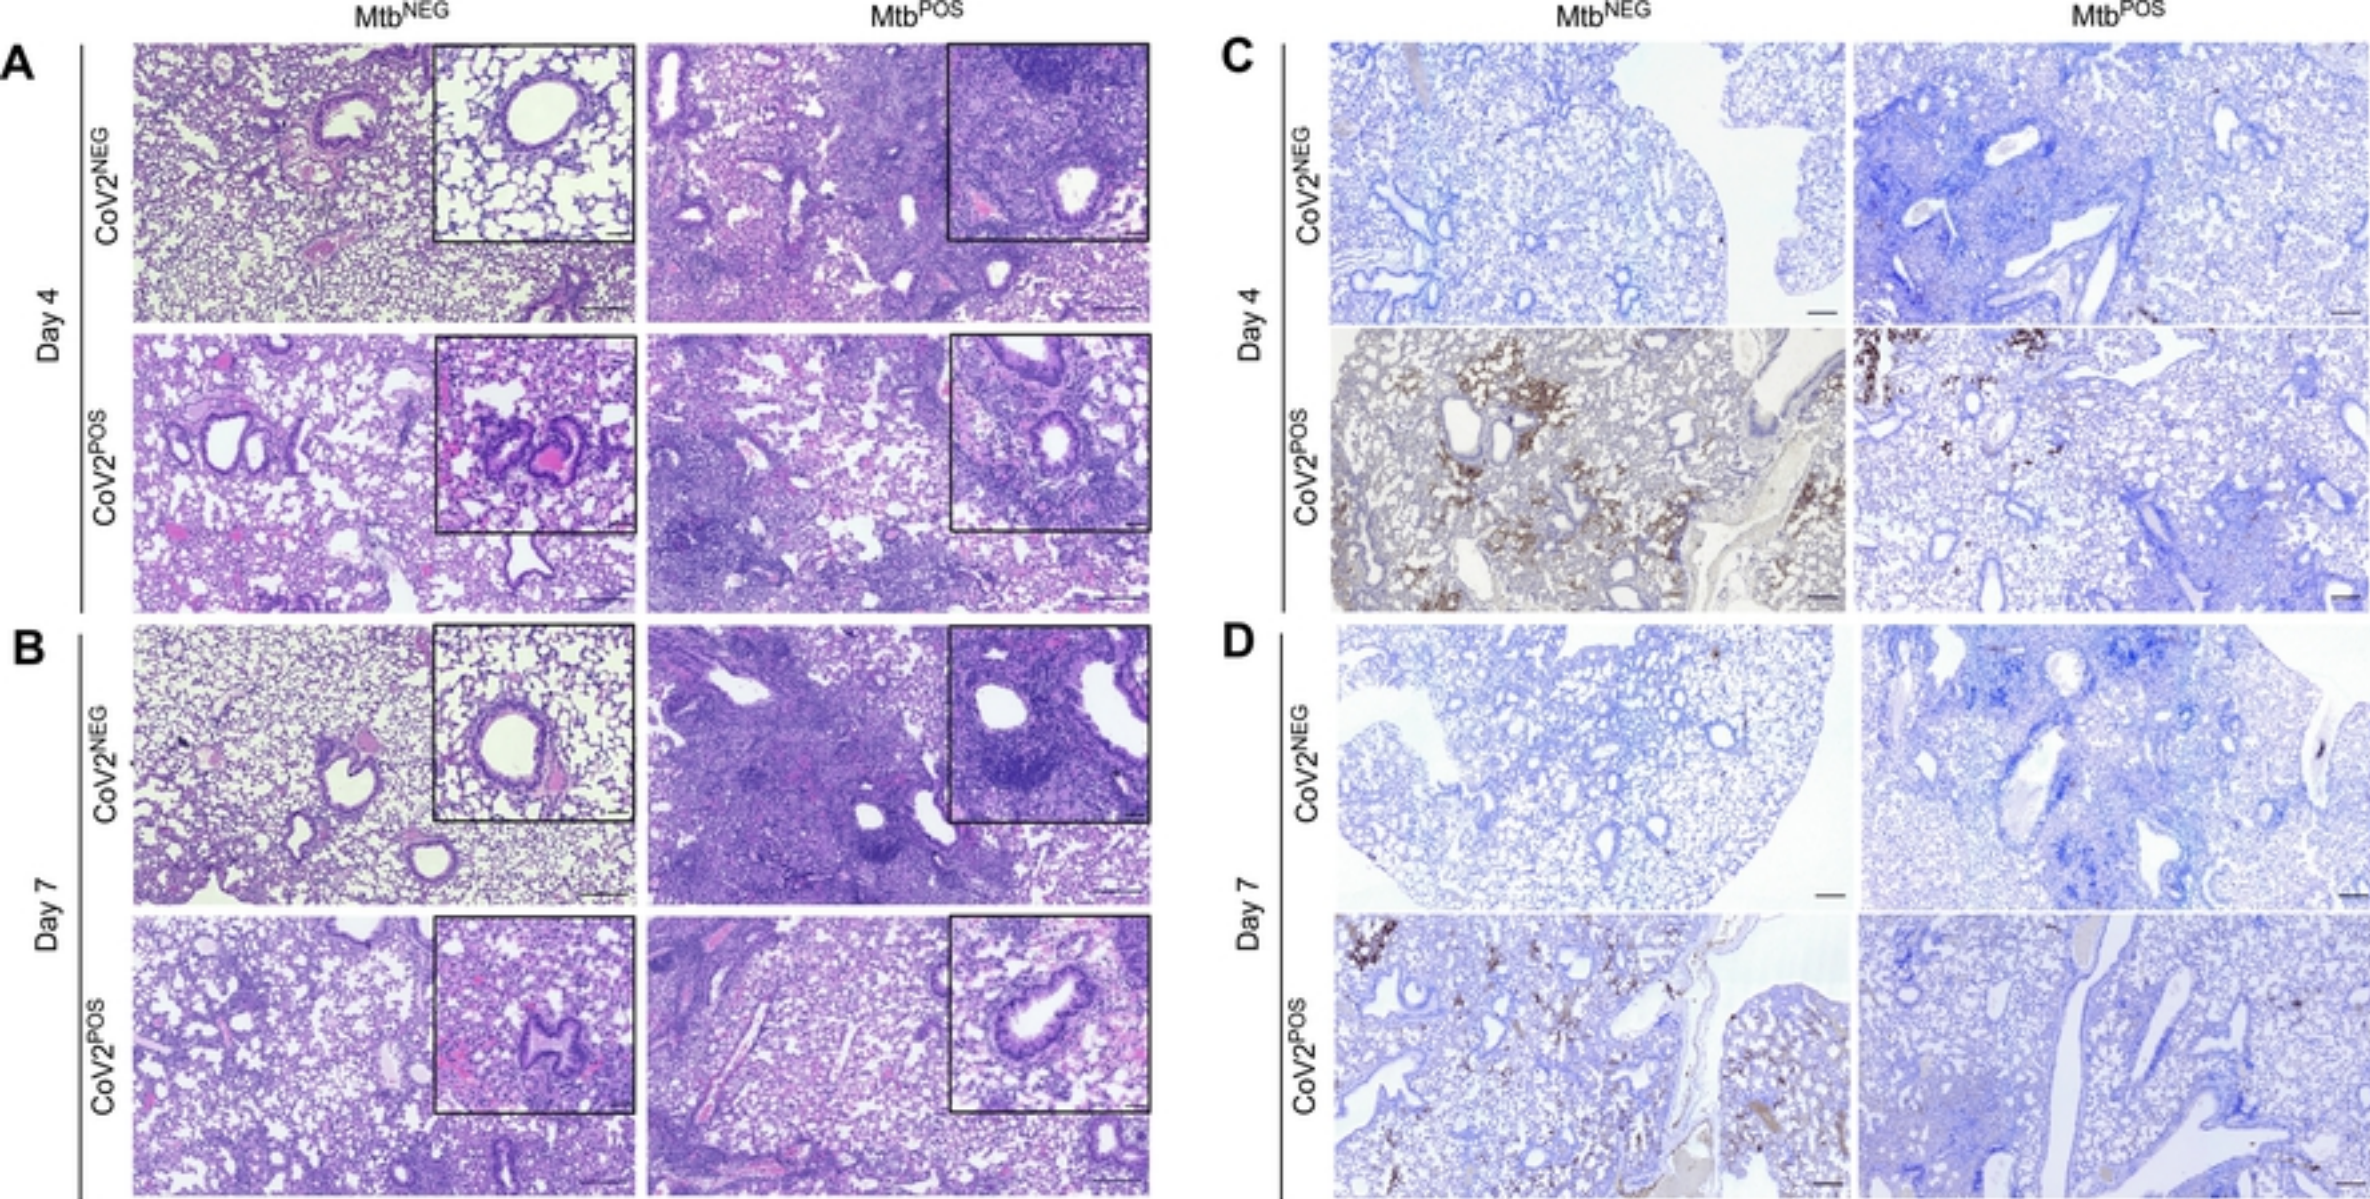

Figure 3

FIG 3

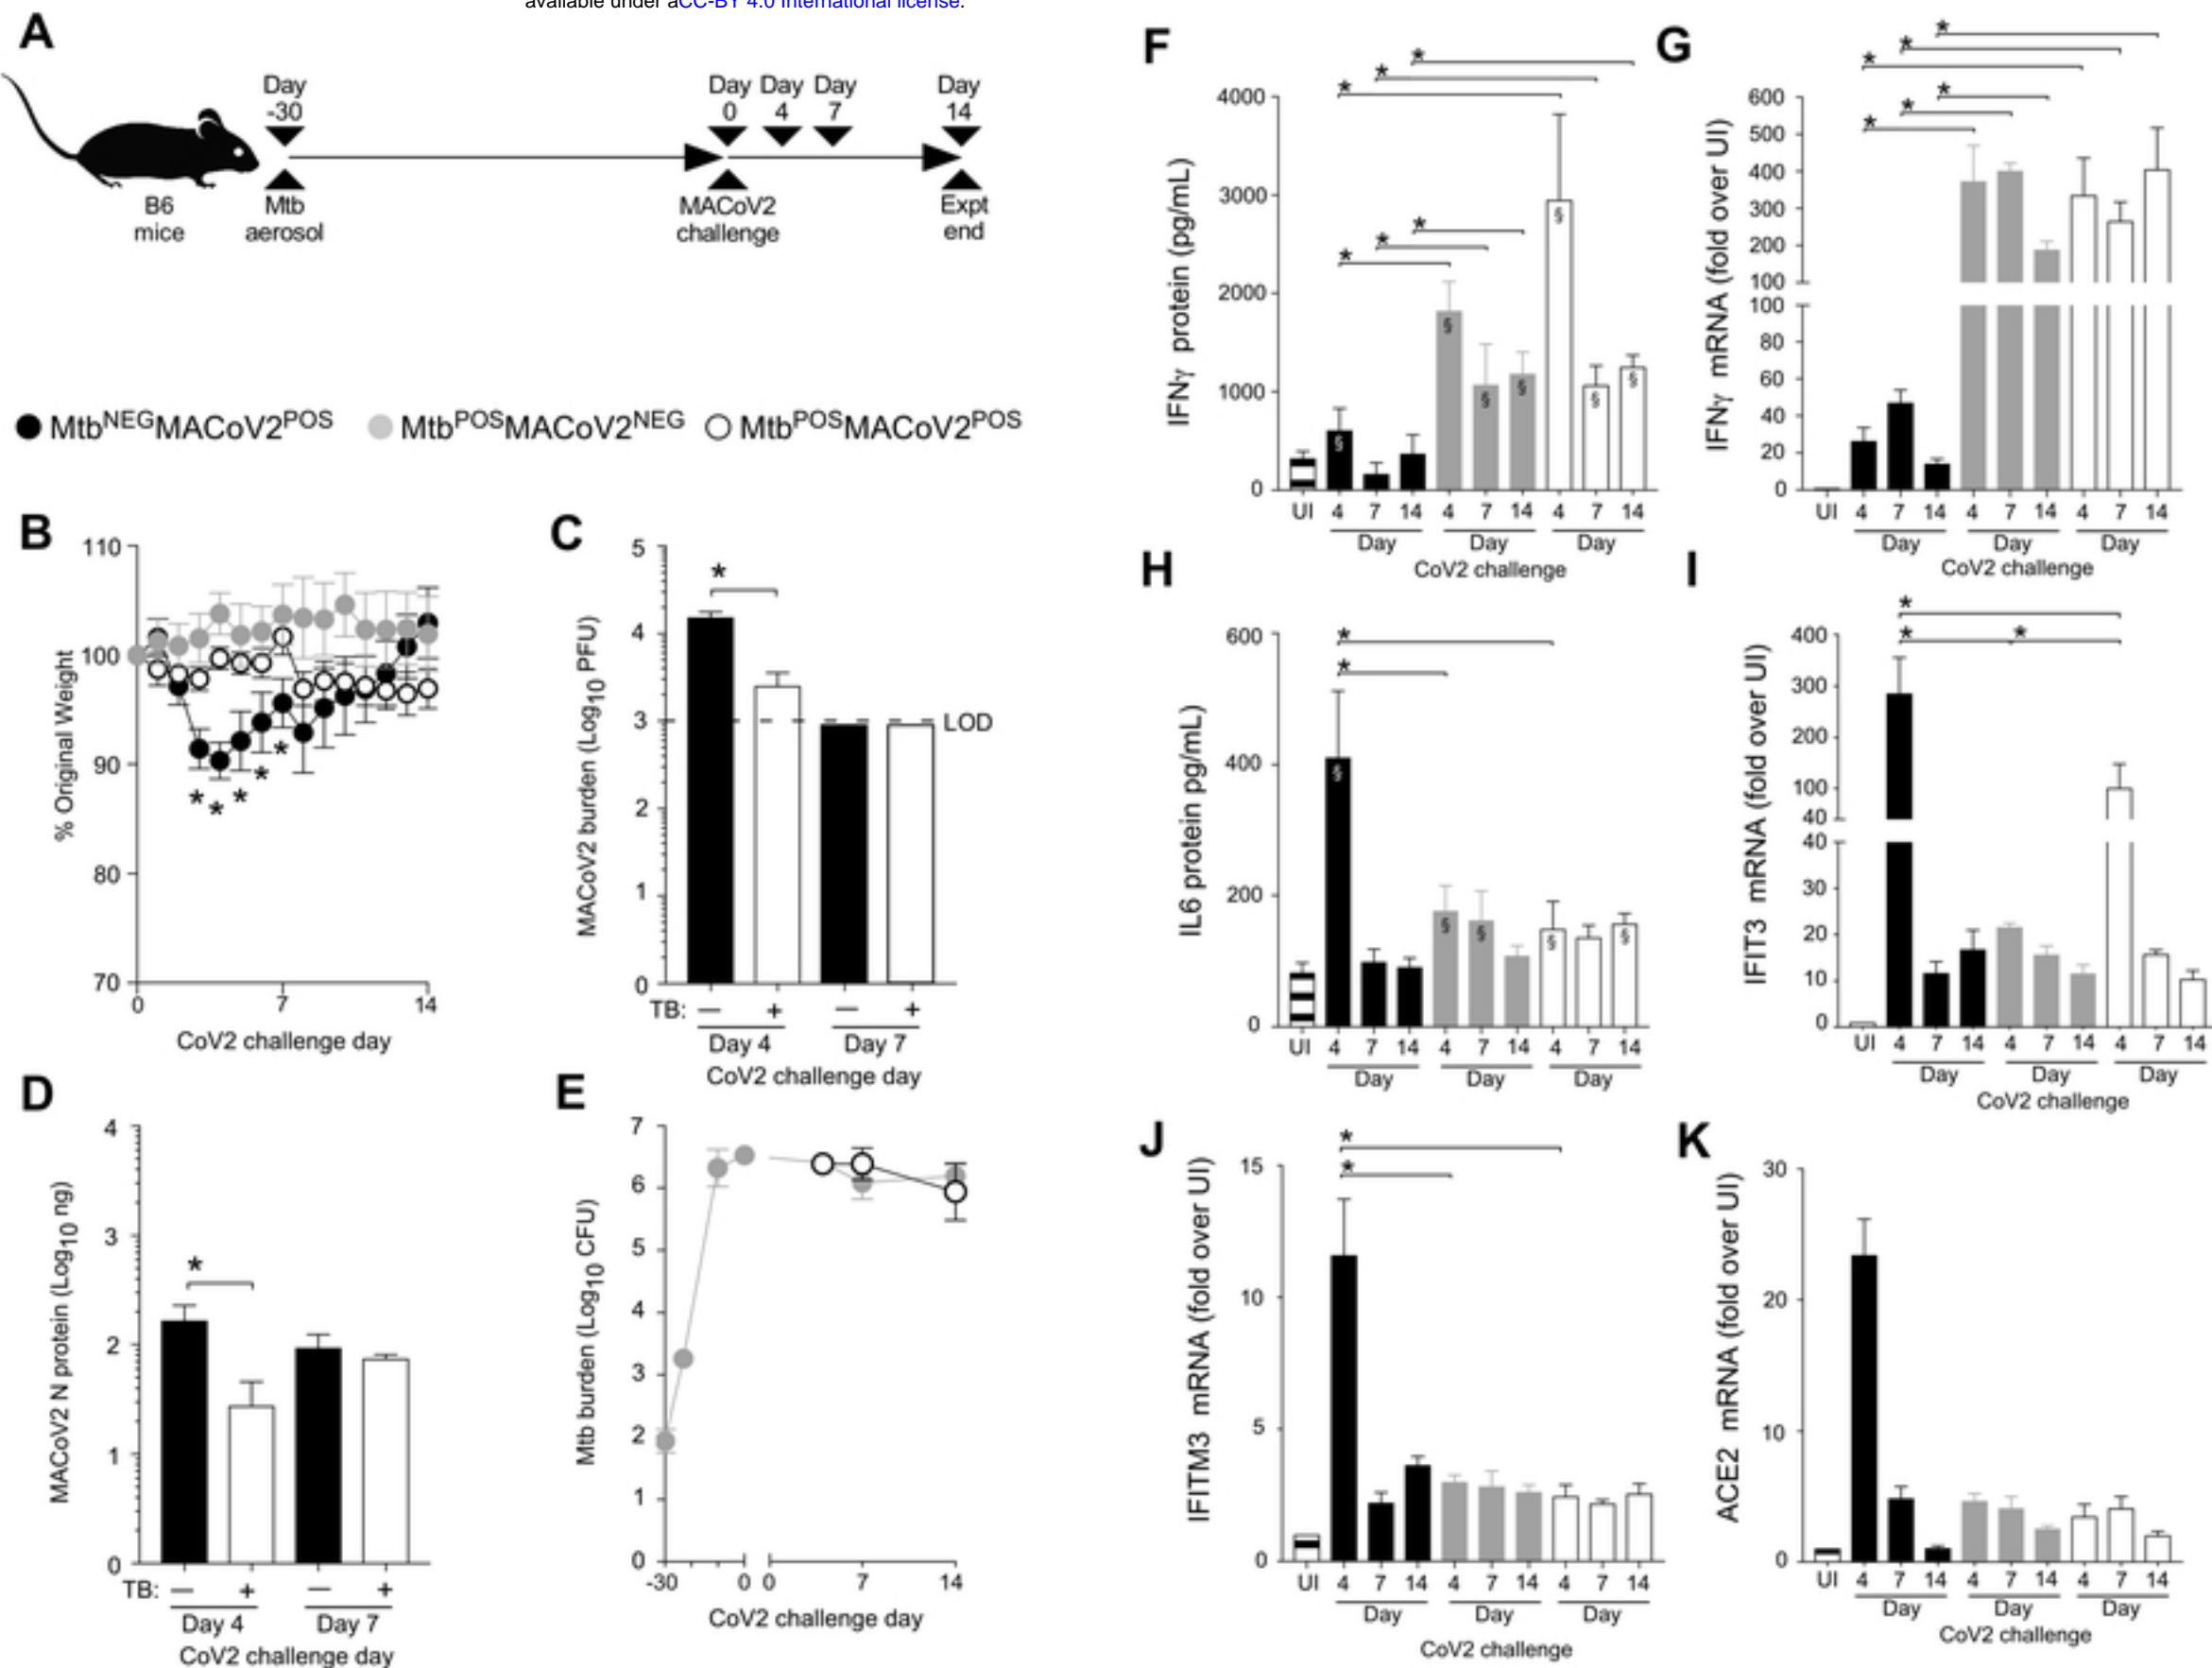

**FIG 4**

Figure 4

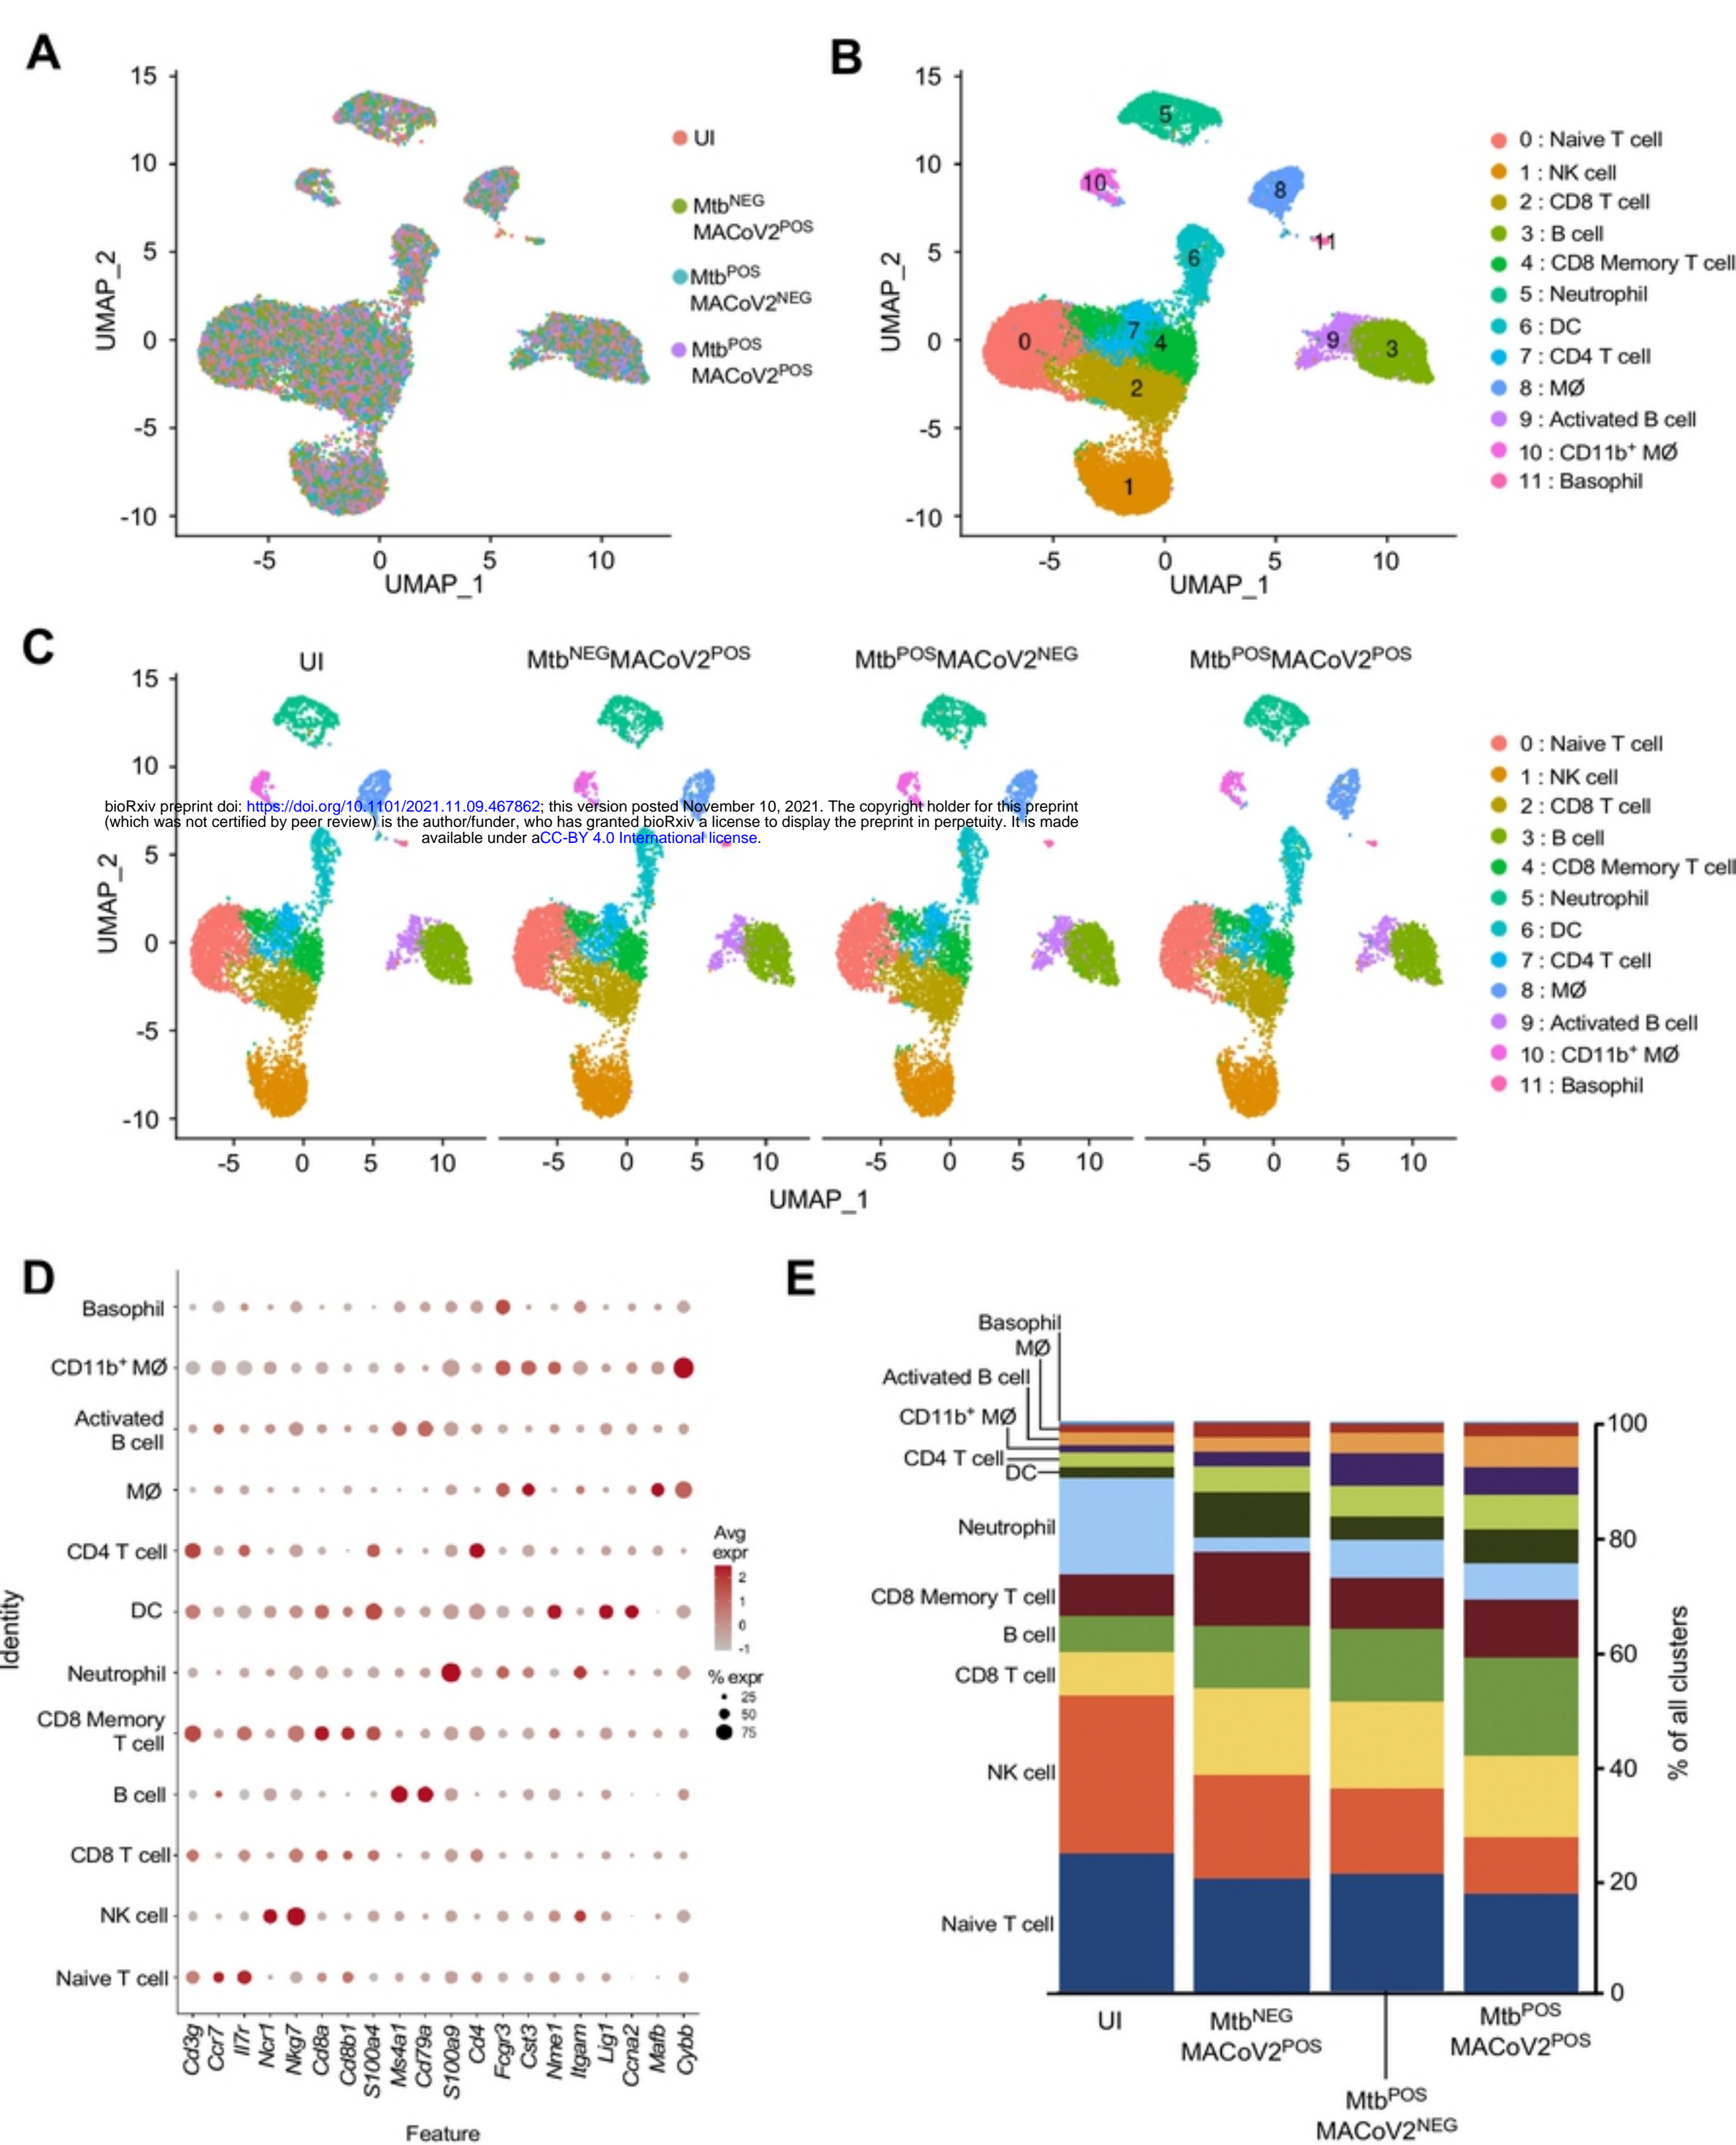

**FIG 5**

Figure 5
